# Supplementary material
Source: HighWire-hosted journal article supplement (https://bmjopen.bmj.com/content/9/10/e028009)
Supplement: inline-supplementary-material-2 [file inline-supplementary-material-2.pdf]

**Supplementary File 2: Search algorithms****Medline Ovid**

- 1 exp Uterine Cervical Neoplasms/
- 2 (cervi\* and (cancer\* or tumor\* or tumour\* or neoplas\* or malignan\* or carcinom\*)),mp.
- 3 exp Cervical Intraepithelial Neoplasia/
- 4 CIN.mp.
- 5 (cervi\* and (intraepithel\* or epithel\* or dysplasia or pre-cancer\* or precancer\*)),mp.
- 6 or/1-5
- 7 exp Conization/
- 8 (conisation or conization).mp.
- 9 exp Laser Therapy/
- 10 laser.mp.
- 11 exp Cryotherapy/
- 12 cryotherapy.mp.
- 13 cold coagulation.mp.
- 14 exp Diathermy/
- 15 diatherm\*.mp.
- 16 cone biopsy.mp.
- 17 loop.mp.
- 18 LLETZ.mp.
- 19 LEEP.mp.
- 20 ablat\*.mp.
- 21 excision\*.mp.
- 22 transformation zone.mp.
- 23 (CKC or LA or LC or CC or RD or TZ).mp.
- 24 (conservative and (method\* or treatment\* or intervention\* or management)),mp.
- 25 or/7-24
- 26 6 and 25
- 27 exp Premature Birth/
- 28 (preterm or premature).mp.
- 29 exp Infant, Low Birth Weight/
- 30 birth weight.mp.
- 31 Perinatal Mortality/
- 32 perinatal mortality.mp.
- 33 exp Intensive Care, Neonatal/
- 34 (neonatal and intensive care).mp.
- 35 exp Fertility/
- 36 fertil\*.mp.
- 37 conception.mp.
- 38 exp Pregnancy/
- 39 pregnancy.mp.
- 40 gestation\*.mp.
- 41 exp Abortion, Spontaneous/
- 42 miscarriage\*.mp.
- 43 exp Cesarean Section/
- 44 (cesarean or caesarean).mp.
- 45 exp Obstetric Labor, Premature/
- 46 exp Labor, Obstetric/
- 47 (labor or labour).mp.

48 Fetal Membranes, Premature Rupture/

49 pPROM.mp.

50 or/27-49

51 26 and 50

key:

mp=title, original title, abstract, name of substance word, subject heading word

### Embase Ovid

1 exp uterine cervix tumor/

2 (cervi\* and (cancer\* or tumor\* or tumour\* or neoplas\* or malignan\* or carcinom\*)).mp.

3 uterine cervix carcinoma in situ/

4 CIN.mp.

5 (cervi\* and (intraepithel\* or epithel\* or dysplasia or pre-cancer\* or precancer\*)).mp.

6 or/1-5

7 uterine cervix conization/

8 (conisation or conization).mp.

9 low level laser therapy/

10 laser.mp.

11 exp cryotherapy/

12 cryotherapy.mp.

13 cold coagulation.mp.

14 diathermy/

15 diatherm\*.mp.

16 cone biopsy.mp.

17 loop.mp.

18 LLETZ.mp.

19 LEEP.mp.

20 ablat\*.mp.

21 excision\*.mp.

22 transformation zone.mp.

23 (CKC or LA or LC or CC or RD or TZ).mp.

24 (conservative and (method\* or treatment\* or intervention\* or management)).mp.

25 or/7-24

26 6 and 25

27 prematurity/

28 (preterm or premature).mp.

29 exp low birth weight/

30 birth weight.mp.

31 perinatal mortality/

32 perinatal mortality.mp.

33 newborn intensive care/

34 (neonat\* and intensive care).mp.

35 female fertility/

36 fertil\*.mp.

37 conception/

38 conception.mp.

39 exp pregnancy/

40 pregnancy.mp.

41 gestation\*.mp.

42 spontaneous abortion/

43 miscarriage\*.mp.  
 44 cesarean section/  
 45 (cesarean or caesarean).mp.  
 46 premature labor/  
 47 (labor or labour).mp.  
 48 premature fetus membrane rupture/  
 49 pPROM.mp.  
 50 or/27-49  
 51 26 and 50  
 key:

mp=title, abstract, subject headings, heading word, drug trade name, original title,  
 device manufacturer, drug manufacturer name

### CENTRAL

#1 MeSH descriptor **Uterine Cervical Neoplasms** explode all trees  
 #2 cervi\* and (cancer\* or tumor\* or tumour\* or neoplas\* or malignan\* or carcinom\*)  
 #3 MeSH descriptor **Cervical Intraepithelial Neoplasia** explode all trees  
 #4 CIN  
 #5 cervi\* and (intraepithel\* or epithel\* or dysplasia or pre-cancer\* or precancer\*)  
 #6 (#1 OR #2 OR #3 OR #4 OR #5)  
 #7 MeSH descriptor **Conization** explode all trees  
 #8 conisation or conization  
 #9 MeSH descriptor **Laser Therapy** explode all trees  
 #10 laser  
 #11 MeSH descriptor **Cryotherapy** explode all trees  
 #12 cryotherapy  
 #13 cold coagulation  
 #14 MeSH descriptor **Diathermy** explode all trees  
 #15 diatherm\*  
 #16 cone biopsy  
 #17 loop  
 #18 LLETZ  
 #19 LEEP  
 #20 ablat\*  
 #21 excision\*  
 #22 transformation zone  
 #23 CKC or LA or LC or CC or RD or TZ  
 #24 conservative and (method\* or treatment\* or intervention\* or management)  
 #25 (#7 OR #8 OR #9 OR #10 OR #11 OR #12 OR #13 OR #14 OR #15 OR #16 OR #17 OR #18 OR #19 OR #20 OR #21 OR #22 OR #23 OR #24)  
 #26 (#6 AND #25)  
 #27 MeSH descriptor **Premature Birth** explode all trees  
 #28 preterm or premature  
 #29 MeSH descriptor **Infant, Low Birth Weight** explode all trees  
 #30 birth weight  
 #31 MeSH descriptor **Perinatal Mortality** explode all trees  
 #32 perinatal mortality  
 #33 MeSH descriptor **Intensive Care, Neonatal** explode all trees  
 #34 neonat\* and (intensive care)  
 #35 MeSH descriptor **Fertility** explode all trees  
 #36 fertil\*

#37 conception  
#38 MeSH descriptor **Pregnancy** explode all trees  
#39 pregnancy  
#40 gestation\*  
#41 MeSH descriptor **Abortion, Spontaneous** explode all trees  
#42 miscarriage\*  
#43 MeSH descriptor **Cesarean Section** explode all trees  
#44 cesarean or caesarean  
#45 MeSH descriptor **Obstetric Labor, Premature** explode all trees  
#46 MeSH descriptor **Labor, Obstetric** explode all trees  
#47 labor or labour  
#48 MeSH descriptor **Fetal Membranes, Premature Rupture** explode all trees  
#49 pPROM  
#50 (#27 OR #28 OR #29 OR #30 OR #31 OR #32 OR #33 OR #34 OR #35 OR #36  
OR #37 OR #38 OR #39 OR #40 OR #41 OR #42 OR #43 OR #44 OR #45 OR #46  
OR #47 OR #48 OR #49)  
#51 (#26 AND #50)
